# Supplementary material for: Effect of Fe, Co and Ni promoters on MoS2 based catalysts for chemoselective hydrogenation of nitroarenes
Source: Royal Society of Chemistry journal article supplement (doi:10.1039/d0ra00320d), 2020-01-01
Supplement: d0ra00320d1.pdf [file d0ra00320d1.pdf]

## Supplementary Information

### Effect of Fe, Co and Ni promoters on MoS<sub>2</sub> based catalysts for chemoselective hydrogenation of nitroarenes

Wenpeng Han<sup>a, b</sup>, Shanmin Wang<sup>c</sup>, Xuekuan Li<sup>a</sup>, Ben Ma<sup>a</sup>, Mingxian Du<sup>a</sup>, Ligong  
Zhou<sup>a</sup>, Ying Yang<sup>a</sup>, Ye Zhang,<sup>a\*</sup> Hui Ge<sup>a\*</sup>

<sup>a</sup> *Institute of Coal Chemistry, Chinese Academy of Sciences, Taiyuan 030001, China*

<sup>b</sup> *University of Chinese Academy of Science, Beijing 100049, China*

<sup>c</sup> *Department of Physics, Southern University of Science & Technology, Shenzhen,  
Guangdong, 518055, China*

\* *Corresponding author. Tel: +86-351-4046547; 18135105377*

*E-mail address: [gehui@sxicc.ac.cn](mailto:gehui@sxicc.ac.cn) (H. Ge); [yzhang@sxicc.ac.cn](mailto:yzhang@sxicc.ac.cn) (Y. Zhang)*

## 1. The evaluation on compatibility and stability over Ni-MoS<sub>2</sub>/γ-

### Al<sub>2</sub>O<sub>3</sub> catalyst

**Table S1.** Summary on the hydrogenation of various nitroarenes over Ni-MoS<sub>2</sub>/γ-Al<sub>2</sub>O<sub>3</sub> catalyst.

| Entry | Substrate                                                                           | N <sub>2</sub> H <sub>4</sub> ·H <sub>2</sub> O (equiv.) | Time/ h | Sel./ yield <sup>a</sup> (%) |
|-------|-------------------------------------------------------------------------------------|----------------------------------------------------------|---------|------------------------------|
| 1     | 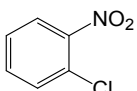   | 3                                                        | 2       | 99/99                        |
| 2     |   | 3                                                        | 6       | 99/99                        |
| 3     |  | 3                                                        | 4       | 99/99                        |
| 4     |  | 3                                                        | 4       | 98/97                        |
| 5     |  | 3                                                        | 4       | 99/99                        |
| 6     |  | 5                                                        | 8       | 98/97                        |
| 7     |  | 5                                                        | 8       | 99/99                        |
| 8     |  | 5                                                        | 12      | 100/99                       |

|    |                                                                                     |   |    |        |
|----|-------------------------------------------------------------------------------------|---|----|--------|
| 9  | 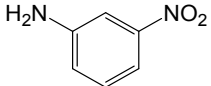   | 8 | 4  | 100/99 |
| 10 |    | 8 | 10 | 99/98  |
| 11 |    | 8 | 6  | 100/99 |
| 12 |    | 6 | 16 | 99/99  |
| 13 |    | 5 | 8  | 99/98  |
| 14 |   | 5 | 8  | 99/99  |
| 15 |  | 5 | 8  | 99/99  |
| 16 |  | 3 | 4  | 99/99  |
| 17 |  | 5 | 8  | 99/98  |
| 18 |  | 3 | 2  | 98/98  |
| 19 |  | 5 | 4  | 99/99  |
| 20 |  | 5 | 8  | 99/99  |

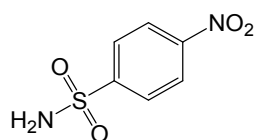

Reaction conditions: 0.1 g catalyst, 1 mmol substrate, 100 °C, 15 mL isopropyl alcohol, 1 MPa N<sub>2</sub>, n equiv. N<sub>2</sub>H<sub>4</sub>·H<sub>2</sub>O, calibration concentration of N<sub>2</sub>H<sub>4</sub>·H<sub>2</sub>O is 79.2%.

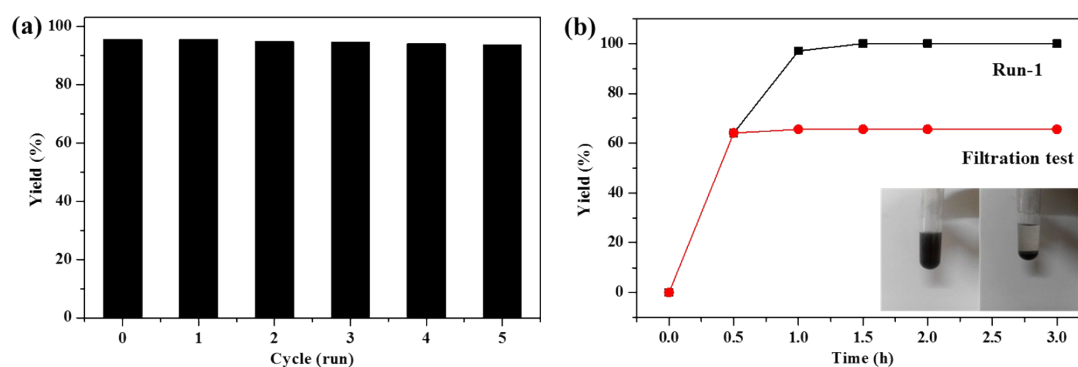

**Fig. S1.** (a) Recyclability test; (b) Hot filtration test. After reaction for 0.5 h, the catalyst was separated under the reaction conditions. Inset of (b): The photographs showing before and after the facile separation via the centrifugation. Reaction conditions: 0.1 g catalyst, 1 mmol nitrobenzene, 100 °C, 15 mL isopropyl alcohol, 1 MPa N<sub>2</sub>, 2 equiv. N<sub>2</sub>H<sub>4</sub>·H<sub>2</sub>O, 1 h.

## 2. Catalysts characterization

### ICP-AES

**Table S2.** The ICP-AES analysis of the metal loading.

| Catalysts                                             | Content of metals      |
|-------------------------------------------------------|------------------------|
| NiO <sub>x</sub> /γ-Al <sub>2</sub> O <sub>3</sub>    | Ni 2.32wt%             |
| MoO <sub>3</sub> /γ-Al <sub>2</sub> O <sub>3</sub>    | Mo 9.67wt%             |
| Fe-MoO <sub>3</sub> /γ-Al <sub>2</sub> O <sub>3</sub> | Fe 2.30wt%; Mo 9.71wt% |
| Co-MoO <sub>3</sub> /γ-Al <sub>2</sub> O <sub>3</sub> | Co 2.26wt%; Mo 9.75wt% |
| Ni-MoO <sub>3</sub> /γ-Al <sub>2</sub> O <sub>3</sub> | Ni 2.34wt%; Mo 9.77wt% |

## XRD

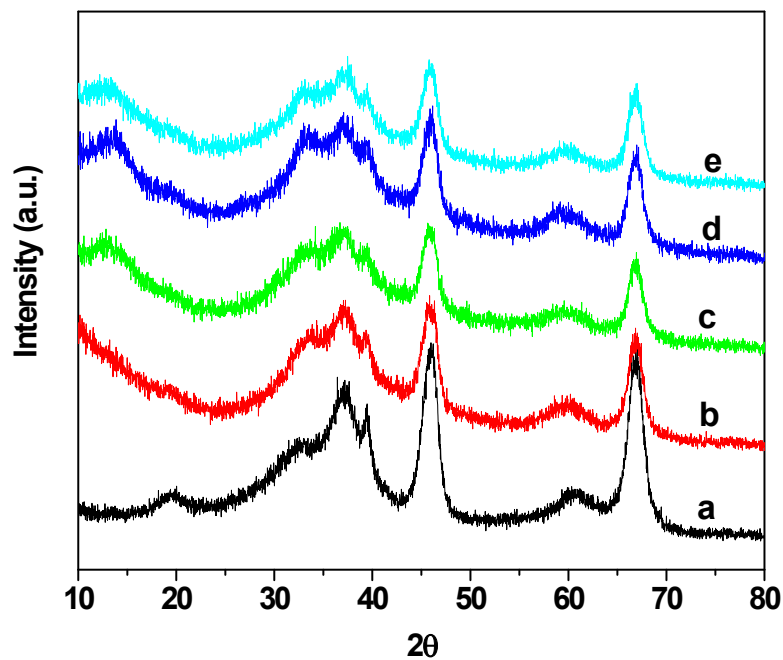

**Fig. S2.** XRD patterns of  $\gamma$ - $\text{Al}_2\text{O}_3$  (a),  $\text{MoS}_2/\gamma$ - $\text{Al}_2\text{O}_3$  (b),  $\text{Co-MoS}_2/\gamma$ - $\text{Al}_2\text{O}_3$  (c),  $\text{Ni-MoS}_2/\gamma$ - $\text{Al}_2\text{O}_3$  (d) and  $\text{Fe-MoS}_2/\gamma$ - $\text{Al}_2\text{O}_3$  (e) catalysts.

## XPS

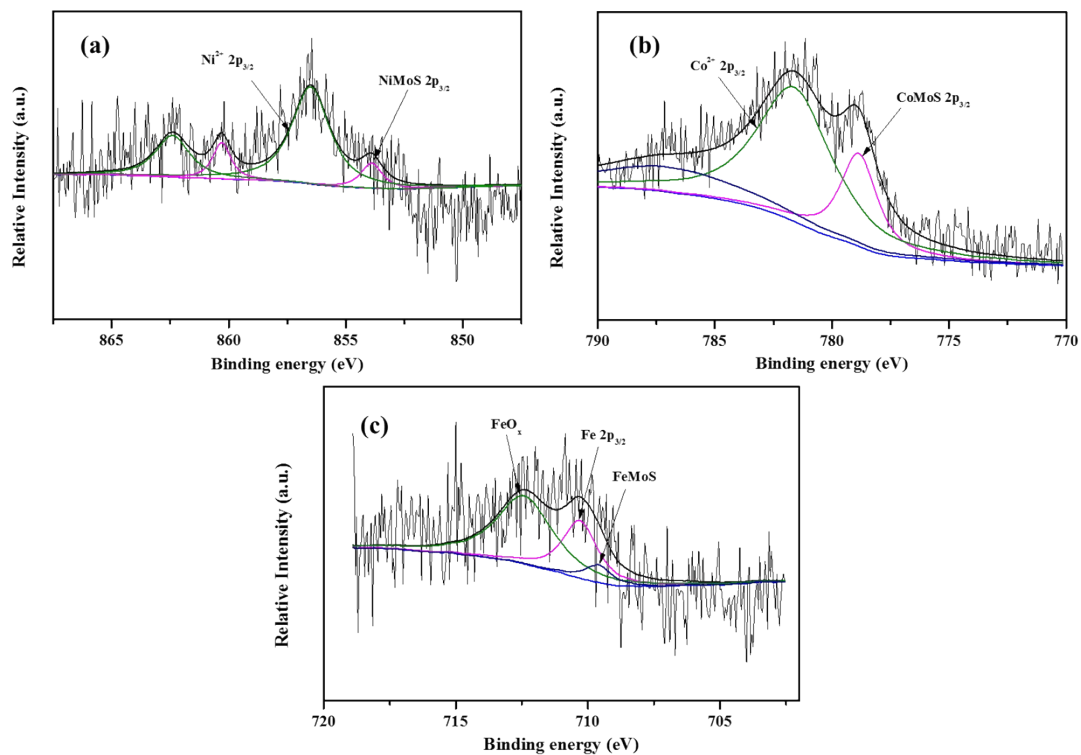

**Fig. S3** XPS spectra showing the binding energies of Ni 2p<sub>3/2</sub> (a), Co 2p<sub>3/2</sub> (b) and Fe 2p<sub>3/2</sub> (c) in various catalysts.

**Table S3.** Synthesis of aniline using different intermediates as substrates over the Ni-MoS<sub>2</sub>/γ-Al<sub>2</sub>O<sub>3</sub> catalyst <sup>a</sup>

| Entry | Reactant                                                                            | Conv. (%) | Select. (%) |
|-------|-------------------------------------------------------------------------------------|-----------|-------------|
| 1     | 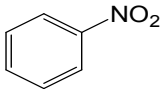   | 67        | 99          |
| 2     |    | 95        | 98          |
| 3     |    | 99        | 99          |
| 4     |   | 7         | 92          |
| 5     |  | 10        | 98          |

<sup>a</sup> Reaction conditions: 0.1 g catalyst, 1 mmol substrate, 100 °C, 0.5 h, 15 mL isopropyl alcohol, 1 MPa N<sub>2</sub>, 2 equiv. N<sub>2</sub>H<sub>4</sub>·H<sub>2</sub>O.

**Table S4.** The NO adsorption on Mo edge by DFT calculation

|    | Adsorption (eV) | kJ/mol  |
|----|-----------------|---------|
| Mo | -0.356          | -34.346 |
| Fe | -0.365          | -35.260 |
| Co | -0.446          | -43.062 |
| Ni | -0.348          | -33.560 |
